# Supplementary material
Source: PubMed Central journal article supplement (PMC5535798)
Supplement: NIHMS878561-supplement-Supplemental_Table.pdf [file NIHMS878561-supplement-Supplemental_Table.pdf]

**Supplementary Table 1** The total number of spines analyzed at 0 h, the number of newly-formed spines over 0-8 h, eliminated new spines over 8-16 h and newly-formed spines over 16-24 h in each mouse at postnatal day 21 (P21) (Data related to **Fig.1f, 2a-c** and **Supplementary Fig. 5a**).

| ND (during development)     |                    |                            |                                        |                                              |                     |                              |                                                                                                                           |          |             |          |              |          |               |           |              |           |
|-----------------------------|--------------------|----------------------------|----------------------------------------|----------------------------------------------|---------------------|------------------------------|---------------------------------------------------------------------------------------------------------------------------|----------|-------------|----------|--------------|----------|---------------|-----------|--------------|-----------|
|                             | # of spines at 0 h | # of new spines over 0-8 h | # of eliminated new spines over 8-16 h | Rate of eliminated new spine over 8-16 h (%) | # of spines at 16 h | # of new spines over 16-24 h | # of new spines formed over 16-24 h and located relative to eliminated (E) or persistent (P) new spines formed over 0-8 h |          |             |          |              |          |               |           |              |           |
|                             |                    |                            |                                        |                                              |                     |                              | 0-2 $\mu$ m                                                                                                               |          | 2-6 $\mu$ m |          | 6-10 $\mu$ m |          | 10-20 $\mu$ m |           | > 20 $\mu$ m |           |
|                             |                    |                            |                                        |                                              |                     |                              | E                                                                                                                         | P        | E           | P        | E            | P        | E             | P         | E            | P         |
| Animal 1                    | 143                | 14                         | 9                                      | 64.29                                        | 150                 | 12                           | 4                                                                                                                         | 2        | 0           | 1        | 1            | 0        | 2             | 2         | 5            | 7         |
| Animal 2 <sup>#</sup>       |                    |                            |                                        |                                              |                     |                              |                                                                                                                           |          |             |          |              |          |               |           |              |           |
| L cortex                    | 156                | 14                         | 10                                     | 71.43                                        | 158                 | 11                           | 5                                                                                                                         | 1        | 1           | 0        | 0            | 0        | 0             | 0         | 5            | 10        |
| R cortex                    | 206                | 17                         | 13                                     | 76.47                                        | 197                 | 7                            | 2                                                                                                                         | 0        | 0           | 0        | 0            | 0        | 1             | 0         | 4            | 7         |
| Animal 3                    | 159                | 18                         | 11                                     | 61.11                                        | 153                 | 9                            | 2                                                                                                                         | 0        | 2           | 4        | 1            | 2        | 3             | 1         | 1            | 2         |
| Animal 4                    | 257                | 11                         | 7                                      | 63.64                                        | 240                 | 16                           | 4                                                                                                                         | 1        | 0           | 0        | 1            | 1        | 3             | 0         | 8            | 14        |
| Animal 5                    | 152                | 11                         | 7                                      | 63.64                                        | 151                 | 8                            | 0                                                                                                                         | 0        | 2           | 1        | 1            | 1        | 0             | 0         | 5            | 6         |
| Animal 6                    | 151                | 14                         | 9                                      | 64.29                                        | 150                 | 11                           | 4                                                                                                                         | 0        | 0           | 2        | 1            | 1        | 2             | 3         | 4            | 5         |
| Animal 7                    | 153                | 14                         | 9                                      | 64.29                                        | 147                 | 8                            | 5                                                                                                                         | 2        | 1           | 1        | 0            | 1        | 0             | 1         | 0            | 5         |
| <b>Total</b>                | <b>1377</b>        | <b>113</b>                 | <b>75</b>                              | <b>66.37</b>                                 | <b>1346</b>         | <b>82</b>                    | <b>26</b>                                                                                                                 | <b>6</b> | <b>6</b>    | <b>9</b> | <b>5</b>     | <b>5</b> | <b>12</b>     | <b>6</b>  | <b>33</b>    | <b>56</b> |
| NREM-d (during development) |                    |                            |                                        |                                              |                     |                              |                                                                                                                           |          |             |          |              |          |               |           |              |           |
|                             | # of spines at 0 h | # of new spines over 0-8 h | # of eliminated new spines over 8-16 h | Rate of eliminated new spine over 8-16 h (%) | # of spines at 16 h | # of new spines over 16-24 h | # of new spines formed over 16-24 h and located relative to eliminated (E) or persistent (P) new spines formed over 0-8 h |          |             |          |              |          |               |           |              |           |
|                             |                    |                            |                                        |                                              |                     |                              | 0-2 $\mu$ m                                                                                                               |          | 2-6 $\mu$ m |          | 6-10 $\mu$ m |          | 10-20 $\mu$ m |           | > 20 $\mu$ m |           |
|                             |                    |                            |                                        |                                              |                     |                              | E                                                                                                                         | P        | E           | P        | E            | P        | E             | P         | E            | P         |
| Animal 1                    | 156                | 9                          | 5                                      | 55.56                                        | 151                 | 9                            | 1                                                                                                                         | 0        | 2           | 1        | 0            | 0        | 1             | 0         | 5            | 8         |
| Animal 2                    | 260                | 21                         | 13                                     | 61.9                                         | 262                 | 17                           | 2                                                                                                                         | 1        | 1           | 1        | 2            | 1        | 4             | 3         | 8            | 11        |
| Animal 3                    | 152                | 17                         | 11                                     | 64.71                                        | 150                 | 11                           | 3                                                                                                                         | 1        | 1           | 2        | 3            | 0        | 1             | 1         | 3            | 7         |
| Animal 4                    | 165                | 12                         | 8                                      | 66.67                                        | 164                 | 9                            | 2                                                                                                                         | 1        | 2           | 0        | 1            | 3        | 1             | 0         | 3            | 5         |
| Animal 5                    | 137                | 12                         | 8                                      | 66.67                                        | 141                 | 9                            | 3                                                                                                                         | 0        | 0           | 3        | 1            | 0        | 2             | 1         | 3            | 5         |
| <b>Total</b>                | <b>870</b>         | <b>71</b>                  | <b>45</b>                              | <b>63.38</b>                                 | <b>868</b>          | <b>55</b>                    | <b>11</b>                                                                                                                 | <b>3</b> | <b>6</b>    | <b>7</b> | <b>7</b>     | <b>4</b> | <b>9</b>      | <b>5</b>  | <b>22</b>    | <b>36</b> |
| REMD (during development)   |                    |                            |                                        |                                              |                     |                              |                                                                                                                           |          |             |          |              |          |               |           |              |           |
|                             | # of spines at 0 h | # of new spines over 0-8 h | # of eliminated new spines over 8-16 h | Rate of eliminated new spine over 8-16 h (%) | # of spines at 16 h | # of new spines over 16-24 h | # of new spines formed over 16-24 h and located relative to eliminated (E) or persistent (P) new spines formed over 0-8 h |          |             |          |              |          |               |           |              |           |
|                             |                    |                            |                                        |                                              |                     |                              | 0-2 $\mu$ m                                                                                                               |          | 2-6 $\mu$ m |          | 6-10 $\mu$ m |          | 10-20 $\mu$ m |           | > 20 $\mu$ m |           |
|                             |                    |                            |                                        |                                              |                     |                              | E                                                                                                                         | P        | E           | P        | E            | P        | E             | P         | E            | P         |
| Animal 1                    | 151                | 14                         | 7                                      | 50                                           | 150                 | 8                            | 0                                                                                                                         | 1        | 1           | 0        | 1            | 2        | 2             | 3         | 4            | 3         |
| Animal 2 <sup>#</sup>       |                    |                            |                                        |                                              |                     |                              |                                                                                                                           |          |             |          |              |          |               |           |              |           |
| L cortex                    | 167                | 12                         | 6                                      | 50                                           | 163                 | 9                            | 2                                                                                                                         | 0        | 1           | 1        | 0            | 0        | 0             | 3         | 6            | 5         |
| R cortex                    | 157                | 13                         | 6                                      | 46.15                                        | 159                 | 11                           | 2                                                                                                                         | 0        | 0           | 1        | 2            | 1        | 1             | 1         | 6            | 8         |
| Animal 3                    | 170                | 18                         | 5                                      | 27.78                                        | 169                 | 11                           | 1                                                                                                                         | 2        | 2           | 1        | 0            | 0        | 3             | 2         | 5            | 6         |
| Animal 4                    | 173                | 9                          | 5                                      | 55.56                                        | 171                 | 13                           | 0                                                                                                                         | 0        | 1           | 1        | 0            | 0        | 1             | 1         | 11           | 11        |
| Animal 5                    | 151                | 8                          | 2                                      | 25                                           | 148                 | 6                            | 0                                                                                                                         | 0        | 0           | 0        | 2            | 0        | 0             | 1         | 4            | 5         |
| Animal 6                    | 157                | 16                         | 7                                      | 43.75                                        | 150                 | 10                           | 1                                                                                                                         | 0        | 2           | 1        | 1            | 2        | 2             | 4         | 4            | 3         |
| Animal 7                    | 153                | 13                         | 6                                      | 46.15                                        | 151                 | 7                            | 0                                                                                                                         | 0        | 2           | 2        | 1            | 1        | 3             | 1         | 1            | 3         |
| <b>Total</b>                | <b>1279</b>        | <b>103</b>                 | <b>44</b>                              | <b>42.72</b>                                 | <b>1261</b>         | <b>75</b>                    | <b>6</b>                                                                                                                  | <b>3</b> | <b>9</b>    | <b>7</b> | <b>7</b>     | <b>6</b> | <b>12</b>     | <b>15</b> | <b>41</b>    | <b>44</b> |

<sup>#</sup> In these animals, new spine survival and distribution were quantified from both left (L) and right (R) motor cortices. In figures 1f, each point represents data from one animal.

**Supplementary Table 2** The total number of spines analyzed at 0 h, the number of newly-formed spines after FW training over 0-8 h and eliminated new spines over 8-24 h in each mouse at postnatal day 30 (P30) (Data related to **Fig. 1k**).

| ND (FW running-induced new spines over 0-8 h)     |                    |                            |                                        |                                              |                                        |                                              |
|---------------------------------------------------|--------------------|----------------------------|----------------------------------------|----------------------------------------------|----------------------------------------|----------------------------------------------|
|                                                   | # of spines at 0 h | # of new spines over 0-8 h | # of eliminated new spines over 8-16 h | Rate of eliminated new spine over 8-16 h (%) | # of eliminated new spines over 8-24 h | Rate of eliminated new spine over 8-24 h (%) |
| Animal 1                                          | 153                | 11                         | 5                                      | 45.45                                        | 6                                      | 54.55                                        |
| Animal 2                                          | 152                | 7                          | 3                                      | 42.86                                        | 4                                      | 57.14                                        |
| Animal 3                                          | 185                | 10                         | 6                                      | 60                                           | 6                                      | 60                                           |
| Animal 4                                          | 174                | 11                         | 6                                      | 54.55                                        | 7                                      | 63.64                                        |
| Animal 5                                          | 160                | 7                          | 3                                      | 42.86                                        | 4                                      | 57.14                                        |
| Animal 6                                          | 188                | 13                         | 8                                      | 61.54                                        | 9                                      | 69.23                                        |
| <b>Total</b>                                      | <b>1012</b>        | <b>59</b>                  | <b>31</b>                              | <b>52.54</b>                                 | <b>36</b>                              | <b>61.02</b>                                 |
| NREM-d (FW running-induced new spines over 0-8 h) |                    |                            |                                        |                                              |                                        |                                              |
|                                                   | # of spines at 0 h | # of new spines over 0-8 h | # of eliminated new spines over 8-16 h | Rate of eliminated new spine over 8-16 h (%) | # of eliminated new spines over 8-24 h | Rate of eliminated new spine over 8-24 h (%) |
| Animal 1                                          | 146                | 12                         | 6                                      | 50                                           | 8                                      | 66.67                                        |
| Animal 2                                          | 282                | 19                         | 12                                     | 63.16                                        | 13                                     | 68.42                                        |
| Animal 3                                          | 225                | 16                         | 9                                      | 56.25                                        | 10                                     | 62.5                                         |
| Animal 4                                          | 222                | 15                         | 9                                      | 60                                           | 9                                      | 60                                           |
| Animal 5                                          | 150                | 11                         | 5                                      | 45.45                                        | 6                                      | 54.55                                        |
| Animal 6                                          | 211                | 14                         | 8                                      | 57.14                                        | 9                                      | 64.29                                        |
| <b>Total</b>                                      | <b>1236</b>        | <b>87</b>                  | <b>49</b>                              | <b>56.32</b>                                 | <b>55</b>                              | <b>63.22</b>                                 |
| REMD (FW running-induced new spines over 0-8 h)   |                    |                            |                                        |                                              |                                        |                                              |
|                                                   | # of spines at 0 h | # of new spines over 0-8 h | # of eliminated new spines over 8-16 h | Rate of eliminated new spine over 8-16 h (%) | # of eliminated new spines over 8-24 h | Rate of eliminated new spine over 8-24 h (%) |
| Animal 1                                          | 145                | 9                          | 3                                      | 33.33                                        | 5                                      | 55.56                                        |
| Animal 2                                          | 156                | 8                          | 3                                      | 37.5                                         | 4                                      | 50                                           |
| Animal 3                                          | 153                | 10                         | 4                                      | 40                                           | 5                                      | 50                                           |
| Animal 4                                          | 153                | 9                          | 2                                      | 22.22                                        | 4                                      | 44.44                                        |
| Animal 5                                          | 157                | 12                         | 4                                      | 33.33                                        | 5                                      | 41.67                                        |
| Animal 6                                          | 158                | 11                         | 4                                      | 36.36                                        | 6                                      | 54.55                                        |
| <b>Total</b>                                      | <b>922</b>         | <b>59</b>                  | <b>20</b>                              | <b>33.90</b>                                 | <b>29</b>                              | <b>49.15</b>                                 |

**Supplementary Table 3** The total number of spines analyzed at 0 h, the number of newly-formed spines over 0-8 h after BW running, eliminated new spines over 8-16h and newly-formed spines over 16-24 h after FW running in each mouse at postnatal day 30 (P30) (Data related to Fig. 1m, 2d-f and Supplementary Fig. 5b)

| ND           |                    |                            |                                        |                                              |                     |                              |                                                                                                                           |          |             |          |              |          |               |           |              |           |
|--------------|--------------------|----------------------------|----------------------------------------|----------------------------------------------|---------------------|------------------------------|---------------------------------------------------------------------------------------------------------------------------|----------|-------------|----------|--------------|----------|---------------|-----------|--------------|-----------|
|              | # of spines at 0 h | # of new spines over 0-8 h | # of eliminated new spines over 8-16 h | Rate of eliminated new spine over 8-16 h (%) | # of spines at 16 h | # of new spines over 16-24 h | # of new spines formed over 16-24 h and located relative to eliminated (E) or persistent (P) new spines formed over 0-8 h |          |             |          |              |          |               |           |              |           |
|              |                    |                            |                                        |                                              |                     |                              | 0-2 $\mu$ m                                                                                                               |          | 2-6 $\mu$ m |          | 6-10 $\mu$ m |          | 10-20 $\mu$ m |           | > 20 $\mu$ m |           |
|              |                    |                            |                                        |                                              |                     |                              | E                                                                                                                         | P        | E           | P        | E            | P        | E             | P         | E            | P         |
| Animal 1 #   |                    |                            |                                        |                                              |                     |                              |                                                                                                                           |          |             |          |              |          |               |           |              |           |
| L cortex     | 157                | 18                         | 12                                     | 66.67                                        | 168                 | 16                           | 2                                                                                                                         | 0        | 1           | 1        | 3            | 1        | 4             | 1         | 6            | 13        |
| R cortex     | 153                | 12                         | 9                                      | 75                                           | 152                 | 12                           | 3                                                                                                                         | 0        | 3           | 1        | 1            | 0        | 2             | 3         | 3            | 8         |
| Animal 2     | 195                | 15                         | 10                                     | 66.67                                        | 192                 | 12                           | 4                                                                                                                         | 1        | 2           | 0        | 3            | 2        | 3             | 3         | 0            | 6         |
| Animal 3     | 156                | 10                         | 6                                      | 60                                           | 159                 | 11                           | 3                                                                                                                         | 1        | 1           | 1        | 2            | 1        | 2             | 2         | 3            | 6         |
| Animal 4     | 152                | 9                          | 5                                      | 55.56                                        | 153                 | 8                            | 4                                                                                                                         | 1        | 0           | 0        | 0            | 0        | 1             | 0         | 3            | 7         |
| Animal 5     | 155                | 7                          | 4                                      | 57.14                                        | 158                 | 7                            | 2                                                                                                                         | 0        | 0           | 0        | 0            | 0        | 0             | 3         | 5            | 4         |
| Animal 6     | 165                | 13                         | 8                                      | 61.54                                        | 172                 | 14                           | 4                                                                                                                         | 0        | 2           | 5        | 0            | 0        | 4             | 2         | 4            | 7         |
| <b>Total</b> | <b>1133</b>        | <b>84</b>                  | <b>54</b>                              | <b>64.28</b>                                 | <b>1154</b>         | <b>80</b>                    | <b>22</b>                                                                                                                 | <b>3</b> | <b>9</b>    | <b>8</b> | <b>9</b>     | <b>4</b> | <b>16</b>     | <b>14</b> | <b>24</b>    | <b>51</b> |
| NREM-d       |                    |                            |                                        |                                              |                     |                              |                                                                                                                           |          |             |          |              |          |               |           |              |           |
|              | # of spines at 0 h | # of new spines over 0-8 h | # of eliminated new spines over 8-16 h | Rate of eliminated new spine over 8-16 h (%) | # of spines at 16 h | # of new spines over 16-24 h | # of new spines formed over 16-24 h and located relative to eliminated (E) or persistent (P) new spines formed over 0-8 h |          |             |          |              |          |               |           |              |           |
|              |                    |                            |                                        |                                              |                     |                              | 0-2 $\mu$ m                                                                                                               |          | 2-6 $\mu$ m |          | 6-10 $\mu$ m |          | 10-20 $\mu$ m |           | > 20 $\mu$ m |           |
|              |                    |                            |                                        |                                              |                     |                              | E                                                                                                                         | P        | E           | P        | E            | P        | E             | P         | E            | P         |
| Animal 1     | 159                | 8                          | 5                                      | 62.5                                         | 164                 | 9                            | 3                                                                                                                         | 0        | 1           | 0        | 1            | 0        | 0             | 3         | 4            | 6         |
| Animal 2     | 154                | 12                         | 8                                      | 66.67                                        | 152                 | 9                            | 4                                                                                                                         | 0        | 1           | 0        | 0            | 1        | 1             | 1         | 3            | 7         |
| Animal 3     | 152                | 10                         | 6                                      | 60                                           | 156                 | 9                            | 2                                                                                                                         | 0        | 1           | 1        | 1            | 1        | 1             | 0         | 4            | 7         |
| Animal 4     | 157                | 11                         | 7                                      | 63.64                                        | 160                 | 11                           | 5                                                                                                                         | 1        | 1           | 2        | 0            | 2        | 3             | 1         | 2            | 5         |
| Animal 5     | 152                | 14                         | 8                                      | 57.14                                        | 156                 | 11                           | 5                                                                                                                         | 2        | 1           | 3        | 4            | 0        | 1             | 1         | 0            | 5         |
| Animal 6     | 159                | 15                         | 7                                      | 46.67                                        | 169                 | 13                           | 3                                                                                                                         | 0        | 4           | 2        | 2            | 1        | 0             | 3         | 4            | 7         |
| <b>Total</b> | <b>933</b>         | <b>70</b>                  | <b>41</b>                              | <b>58.57</b>                                 | <b>957</b>          | <b>62</b>                    | <b>22</b>                                                                                                                 | <b>3</b> | <b>9</b>    | <b>8</b> | <b>8</b>     | <b>5</b> | <b>6</b>      | <b>9</b>  | <b>17</b>    | <b>37</b> |
| REMD         |                    |                            |                                        |                                              |                     |                              |                                                                                                                           |          |             |          |              |          |               |           |              |           |
|              | # of spines at 0 h | # of new spines over 0-8 h | # of eliminated new spines over 8-16 h | Rate of eliminated new spine over 8-16 h (%) | # of spines at 16 h | # of new spines over 16-24 h | # of new spines formed over 16-24 h and located relative to eliminated (E) or persistent (P) new spines formed over 0-8 h |          |             |          |              |          |               |           |              |           |
|              |                    |                            |                                        |                                              |                     |                              | 0-2 $\mu$ m                                                                                                               |          | 2-6 $\mu$ m |          | 6-10 $\mu$ m |          | 10-20 $\mu$ m |           | > 20 $\mu$ m |           |
|              |                    |                            |                                        |                                              |                     |                              | E                                                                                                                         | P        | E           | P        | E            | P        | E             | P         | E            | P         |
| Animal 1 #   |                    |                            |                                        |                                              |                     |                              |                                                                                                                           |          |             |          |              |          |               |           |              |           |
| L cortex     | 198                | 13                         | 5                                      | 38.46                                        | 204                 | 11                           | 3                                                                                                                         | 1        | 2           | 1        | 1            | 0        | 0             | 2         | 5            | 7         |
| R cortex     | 296                | 17                         | 9                                      | 52.94                                        | 306                 | 14                           | 1                                                                                                                         | 0        | 1           | 1        | 2            | 1        | 3             | 2         | 7            | 10        |
| Animal 2     | 164                | 11                         | 4                                      | 36.36                                        | 169                 | 6                            | 0                                                                                                                         | 0        | 0           | 1        | 1            | 1        | 1             | 2         | 4            | 2         |
| Animal 3     | 179                | 16                         | 9                                      | 56.25                                        | 188                 | 8                            | 2                                                                                                                         | 0        | 1           | 2        | 1            | 2        | 2             | 0         | 2            | 4         |
| Animal 4 #   |                    |                            |                                        |                                              |                     |                              |                                                                                                                           |          |             |          |              |          |               |           |              |           |
| L cortex     | 162                | 8                          | 3                                      | 37.5                                         | 162                 | 6                            | 1                                                                                                                         | 0        | 0           | 0        | 0            | 0        | 0             | 0         | 5            | 6         |
| R cortex     | 180                | 17                         | 8                                      | 47.06                                        | 181                 | 11                           | 0                                                                                                                         | 0        | 4           | 3        | 1            | 1        | 2             | 3         | 4            | 4         |
| Animal 5     | 151                | 11                         | 5                                      | 45.45                                        | 152                 | 6                            | 1                                                                                                                         | 1        | 0           | 0        | 0            | 0        | 1             | 1         | 4            | 4         |
| Animal 6 #   |                    |                            |                                        |                                              |                     |                              |                                                                                                                           |          |             |          |              |          |               |           |              |           |
| L cortex     | 141                | 8                          | 3                                      | 37.5                                         | 149                 | 4                            | 1                                                                                                                         | 0        | 0           | 0        | 1            | 1        | 0             | 0         | 2            | 3         |
| R cortex     | 202                | 19                         | 11                                     | 57.89                                        | 201                 | 11                           | 2                                                                                                                         | 0        | 2           | 0        | 2            | 1        | 0             | 1         | 5            | 9         |
| <b>Total</b> | <b>1673</b>        | <b>120</b>                 | <b>57</b>                              | <b>47.5</b>                                  | <b>1712</b>         | <b>77</b>                    | <b>11</b>                                                                                                                 | <b>2</b> | <b>10</b>   | <b>8</b> | <b>9</b>     | <b>7</b> | <b>9</b>      | <b>11</b> | <b>38</b>    | <b>49</b> |

# In these animals, new spine survival and distribution were quantified from both left (L) and right (R) motor cortices. In Extended Data Fig. 5b, each point represents data from one animal.

**Supplementary Table 4** The total number of spines analyzed at 0 h, the number of newly-formed spines over 0-24 h after FW running and eliminated new spines over 24-36 h in each mouse at postnatal day 30 (P30) (Data related **Supplementary Fig. 4c**).

| ND (FW running-induced new spines over 0-24 h)  |                    |                             |                                         |                                               |
|-------------------------------------------------|--------------------|-----------------------------|-----------------------------------------|-----------------------------------------------|
|                                                 | # of spines at 0 h | # of new spines over 0-24 h | # of eliminated new spines over 24-36 h | Rate of eliminated new spine over 24-36 h (%) |
| Animal 1                                        | 113                | 10                          | 5                                       | 50                                            |
| Animal 2                                        | 155                | 12                          | 7                                       | 58.33                                         |
| Animal 3                                        | 167                | 14                          | 7                                       | 50                                            |
| Animal 4                                        | 163                | 14                          | 8                                       | 57.14                                         |
| Animal 5                                        | 156                | 13                          | 7                                       | 53.85                                         |
| Animal 6                                        | 151                | 13                          | 6                                       | 46.15                                         |
| Animal 7                                        | 165                | 15                          | 8                                       | 53.33                                         |
| Animal 8                                        | 163                | 17                          | 10                                      | 58.82                                         |
| Animal 9                                        | 145                | 11                          | 6                                       | 54.55                                         |
| <b>Total</b>                                    | <b>1378</b>        | <b>119</b>                  | <b>64</b>                               | <b>53.78</b>                                  |
| REMD (FW running-induced new spines over 0-8 h) |                    |                             |                                         |                                               |
|                                                 | # of spines at 0 h | # of new spines over 0-8 h  | # of eliminated new spines over 8-16 h  | Rate of eliminated new spine over 8-16 h (%)  |
| Animal 1                                        | 158                | 13                          | 4                                       | 30.77                                         |
| Animal 2                                        | 155                | 12                          | 3                                       | 25                                            |
| Animal 3                                        | 161                | 15                          | 4                                       | 26.67                                         |
| Animal 4                                        | 149                | 13                          | 4                                       | 30.77                                         |
| Animal 5                                        | 136                | 13                          | 5                                       | 38.46                                         |
| Animal 6                                        | 171                | 14                          | 5                                       | 35.71                                         |
| <b>Total</b>                                    | <b>930</b>         | <b>80</b>                   | <b>25</b>                               | <b>31.25</b>                                  |

**Supplementary Table 5** The performance (r.p.m.) of FW running at 16 h and 24 h, and performance improvement (%) of FW running over 16-24 h under various conditions (Data related to **Fig. 2I**).

| ND       |                                                         |                                                         |                             |
|----------|---------------------------------------------------------|---------------------------------------------------------|-----------------------------|
|          | FW performance at 16 h (r.p.m.)<br>Average of 40 trials | FW performance at 24 h (r.p.m.)<br>Average of 20 trials | Performance improvement (%) |
| Animal 1 | 35.1                                                    | 47.5                                                    | 35.33                       |
| Animal 2 | 26.1                                                    | 38.81                                                   | 48.72                       |
| Animal 3 | 34.93                                                   | 49                                                      | 40.3                        |
| Animal 4 | 27.81                                                   | 40.57                                                   | 45.89                       |
| Animal 5 | 31.05                                                   | 45.52                                                   | 46.61                       |
| Animal 6 | 34.35                                                   | 67.85                                                   | 97.53                       |
| Animal 7 | 26.45                                                   | 38.8                                                    | 46.69                       |
| Average  | 30.83                                                   | 46.86                                                   | 51.58                       |
| NREM-d   |                                                         |                                                         |                             |
|          | FW performance at 16 h (r.p.m.)<br>Average of 40 trials | FW performance at 24 h (r.p.m.)<br>Average of 20 trials | Performance improvement (%) |
| Animal 1 | 38.88                                                   | 53.4                                                    | 37.36                       |
| Animal 2 | 26.13                                                   | 35.67                                                   | 36.52                       |
| Animal 3 | 36.88                                                   | 59.75                                                   | 62.03                       |
| Animal 4 | 34.5                                                    | 60.7                                                    | 75.94                       |
| Animal 5 | 37.83                                                   | 57.85                                                   | 52.94                       |
| Animal 6 | 27.2                                                    | 46.5                                                    | 70.96                       |
| Animal 7 | 32.93                                                   | 48.45                                                   | 47.15                       |
| Average  | 33.48                                                   | 51.76                                                   | 54.7                        |
| REMD     |                                                         |                                                         |                             |
|          | FW performance at 16 h (r.p.m.)<br>Average of 40 trials | FW performance at 24 h (r.p.m.)<br>Average of 20 trials | Performance improvement (%) |
| Animal 1 | 24.48                                                   | 33.95                                                   | 38.72                       |
| Animal 2 | 34.73                                                   | 38.33                                                   | 10.39                       |
| Animal 3 | 26.43                                                   | 30.65                                                   | 15.97                       |
| Animal 4 | 25.14                                                   | 32.05                                                   | 27.46                       |
| Animal 5 | 42.15                                                   | 54.1                                                    | 28.35                       |
| Animal 6 | 31.35                                                   | 35.95                                                   | 14.67                       |
| Average  | 30.71                                                   | 37.51                                                   | 22.6                        |

**Supplementary Table 6** The performance (r.p.m.) of FW running at 0 h and 24 h, and performance improvement (%) of FW running over 0-24 h under various conditions (Data related to **Fig. 3k**).

| ND       |                                                        |                                                         |                             |
|----------|--------------------------------------------------------|---------------------------------------------------------|-----------------------------|
|          | FW performance at 0 h (r.p.m.)<br>Average of 40 trials | FW performance at 24 h (r.p.m.)<br>Average of 20 trials | Performance improvement (%) |
| Animal 1 | 23                                                     | 34.3                                                    | 49.13                       |
| Animal 2 | 18.1                                                   | 36.85                                                   | 103.65                      |
| Animal 3 | 23.64                                                  | 41.8                                                    | 76.8                        |
| Animal 4 | 26.67                                                  | 46.65                                                   | 74.94                       |
| Animal 5 | 26.29                                                  | 44.35                                                   | 68.69                       |
| Animal 6 | 24.68                                                  | 41.55                                                   | 68.33                       |
| Average  | 23.73                                                  | 40.92                                                   | 73.59                       |
| NREM-d   |                                                        |                                                         |                             |
|          | FW performance at 0 h (r.p.m.)<br>Average of 40 trials | FW performance at 24 h (r.p.m.)<br>Average of 20 trials | Performance improvement (%) |
| Animal 1 | 26.9                                                   | 47.9                                                    | 78.04                       |
| Animal 2 | 23.86                                                  | 37.45                                                   | 56.98                       |
| Animal 3 | 31.49                                                  | 53.7                                                    | 70.54                       |
| Animal 4 | 24.37                                                  | 42.58                                                   | 74.75                       |
| Animal 5 | 25.41                                                  | 46.2                                                    | 81.79                       |
| Animal 6 | 23.71                                                  | 42.15                                                   | 77.79                       |
| Average  | 25.96                                                  | 45                                                      | 73.31                       |
| REMD     |                                                        |                                                         |                             |
|          | FW performance at 0 h (r.p.m.)<br>Average of 40 trials | FW performance at 24 h (r.p.m.)<br>Average of 20 trials | Performance improvement (%) |
| Animal 1 | 25.98                                                  | 48.15                                                   | 85.36                       |
| Animal 2 | 19.06                                                  | 27.95                                                   | 46.68                       |
| Animal 3 | 29.67                                                  | 38.7                                                    | 30.45                       |
| Animal 4 | 24.35                                                  | 40.29                                                   | 65.47                       |
| Animal 5 | 36.12                                                  | 50.8                                                    | 40.63                       |
| Animal 6 | 30.37                                                  | 35.55                                                   | 17.07                       |
| Animal 7 | 29.12                                                  | 33.2                                                    | 14.00                       |
| Average  | 27.81                                                  | 39.23                                                   | 42.81                       |
